# Supplementary material
Source: MDPI journal article supplement (https://www.mdpi.com/2311-5637/8/12/680)
Supplement: s1 [file s1]

## Supplementary Materials

**Table S1.** Stoichiometry and kinetic equations of the anaerobic digestion for bioCH<sub>4</sub> production [1,2].

| Conversion steps                        | Stoichiometry                                                                                                                                                                                                    | Kinetic equations                                                                                                                          |
|-----------------------------------------|------------------------------------------------------------------------------------------------------------------------------------------------------------------------------------------------------------------|--------------------------------------------------------------------------------------------------------------------------------------------|
| <b>Enzymatic hydrolysis</b>             |                                                                                                                                                                                                                  |                                                                                                                                            |
| Carbohydrate hydrolysis                 | $(C_6H_{10}O_5)_{is} \rightarrow Y_c (C_6H_{10}O_5)_s + (1 - Y_c) (C_6H_{10}O_5)_{in}$                                                                                                                           | $R_s = k S$                                                                                                                                |
| Protein hydrolysis                      | $(Protein)_{is} \rightarrow Y_p (Amino\ acids) + (1 - Y_p) (Protein)_{in}$                                                                                                                                       | $R_s = k S$                                                                                                                                |
| <b>Bacterial steps</b>                  |                                                                                                                                                                                                                  |                                                                                                                                            |
| Acidogenic glucose degrading            | $(C_6H_{10}O_5)_3 + 0.1115 NH_3 \rightarrow 0.1115 C_5H_7NO_2 + 0.744 C_2H_4O_2 + 0.5 C_3H_6O_2 + 0.4409 C_4H_8O_2 + 0.6909 CO_2 + 0.0254 H_2O$                                                                  | $\mu = \mu_{max}(T) \left( \frac{1}{1 + \frac{K_s}{[(C_6H_{10}O_5)_s]}} \right)$                                                           |
| Lipolytic                               | $C_{57}H_{104}O_6 + 1.90695 H_2O + 0.04071 NH_3 + 0.0291 CO_2 \rightarrow 0.04071 C_5H_7NO_2 + 0.941843 C_3H_6O_2 + 3 C_{18}H_{34}O_2$                                                                           | $\mu = \mu_{max}(T) \left( \frac{1}{1 + \frac{K_s}{[GTO]}} \right)$                                                                        |
| Long chain fatty acids (LCFA)-degrading | $C_{18}H_{34}O_2 + 7.7401 H_2O + 4.0834 CO_2 + 0.2537 NH_3 \rightarrow 0.2537 C_5H_7NO_2 + 8.6998 C_2H_4O_2 + 3.4139 CH_4$                                                                                       | $\mu = \mu_{max}(T) \left( \frac{1}{1 + \frac{K_{s,LCFA}}{[LCFA]} + \frac{[LCFA]}{K_{i,LCFA}}} \right)$                                    |
| Amino acid-degrading                    | $CH_{2.03}O_{0.6}N_{0.3}S_{0.001} + 0.3006 H_2O \rightarrow 0.017013 C_5H_7NO_2 + 0.29742 C_2H_4O_2 + 0.02904 C_3H_6O_2 + 0.022826 C_4H_8O_2 + 0.013202 C_5H_{10}O_2 + 0.07527 CO_2 + 0.28298 NH_3 + 0.001 H_2S$ | $\mu = \mu_{max}(T)$                                                                                                                       |
| Propionate-degrading                    | $C_3H_6O_2 + 0.06198 NH_3 + 0.314 H_2O \rightarrow 0.06198 C_5H_7NO_2 + 0.9345 C_2H_4O_2 + 0.6604 CH_4 + 0.1607 CO_2$                                                                                            | $\mu = \mu_{max}(T) \left( \frac{1}{1 + \frac{K_s}{[C_3H_6O_2]}} \right) \left( \frac{1}{1 + \frac{[C_2H_4O_2]}{K_{i,C_2H_4O_2}}} \right)$ |

|                              |                                                                                                                                                                                                                                                                               |                                                                                                                                                                                                              |
|------------------------------|-------------------------------------------------------------------------------------------------------------------------------------------------------------------------------------------------------------------------------------------------------------------------------|--------------------------------------------------------------------------------------------------------------------------------------------------------------------------------------------------------------|
| Butyrate-degrading           | $\text{C}_4\text{H}_8\text{O}_2 + 0.0653 \text{ NH}_3 + 0.5543 \text{ CO}_2 + 0.8038 \text{ H}_2\text{O}$ $\rightarrow 0.0653 \text{ C}_5\text{H}_7\text{NO}_2 + 1.8909 \text{ C}_2\text{H}_4\text{O}_2 + 0.4452 \text{ CH}_4$                                                | $\mu = \mu_{max}(T) \left( \frac{1}{1 + \frac{K_s}{[\text{C}_4\text{H}_8\text{O}_2]}} \right) \left( \frac{1}{1 + \frac{[\text{C}_2\text{H}_4\text{O}_2]}{K_{i,\text{C}_2\text{H}_4\text{O}_2}}} \right)$    |
| Valerate-degrading           | $\text{C}_5\text{H}_{10}\text{O}_2 + 0.0653 \text{ NH}_3 + 0.5543 \text{ CO}_2 + 0.8045 \text{ H}_2\text{O}$ $\rightarrow 0.0653 \text{ C}_5\text{H}_7\text{NO}_2 + 0.8912 \text{ C}_2\text{H}_4\text{O}_2 + 0.02904 \text{ C}_3\text{H}_6\text{O}_2$ $+ 0.4454 \text{ CH}_4$ | $\mu = \mu_{max}(T) \left( \frac{1}{1 + \frac{K_s}{[\text{C}_5\text{H}_{10}\text{O}_2]}} \right) \left( \frac{1}{1 + \frac{[\text{C}_2\text{H}_4\text{O}_2]}{K_{i,\text{C}_2\text{H}_4\text{O}_2}}} \right)$ |
| Acetoclastic<br>methanogenic | $\text{C}_2\text{H}_4\text{O}_2 + 0.022 \text{ NH}_3 \rightarrow 0.022 \text{ C}_5\text{H}_7\text{NO}_2 + 0.945 \text{ CH}_4$ $+ 0.945 \text{ CO}_2 + 0.066 \text{ H}_2\text{O}$                                                                                              | $\mu = \mu_{max}(T) \left( \frac{1}{1 + \frac{K_s}{[\text{C}_2\text{H}_4\text{O}_2]}} \right) \left( \frac{1}{1 + \frac{[\text{NH}_3]}{K_{i,\text{NH}_3}}} \right)$                                          |

---

**Table S2. Details of life cycle inventory database for FW-based GM production in China [3].**

| Scenario    | Base case                                                                   | Wind                                                                                             | Photovoltaic                                                                                                                | Hydro                                                                                    |
|-------------|-----------------------------------------------------------------------------|--------------------------------------------------------------------------------------------------|-----------------------------------------------------------------------------------------------------------------------------|------------------------------------------------------------------------------------------|
| FW          | FW collection in lower-middle income country                                |                                                                                                  |                                                                                                                             |                                                                                          |
| Heat        | Heat, district or industrial, natural gas {GLO}  market group for   APOS, U |                                                                                                  |                                                                                                                             |                                                                                          |
| Electricity | Electricity, high voltage {CN}  market group for   APOS, U                  | Electricity, high voltage {CN-BJ}  electricity production, wind, >3MW turbine, onshore   APOS, U | Electricity, low voltage {CN-BJ}  electricity production, photovoltaic, 570kWp open ground installation, multi-Si   APOS, U | Electricity, high voltage {CN-BJ}  electricity production, hydro, run-of-river   APOS, U |

## References

1. Angelidaki, I.; Ellegaard, L.; Ahring, B.K. A mathematical model for dynamic simulation of anaerobic digestion of complex substrates: focusing on ammonia inhibition. *Biotechnology and bioengineering* **1993**, *42*, 159-166.
2. Angelidaki, I.; Ellegaard, L.; Ahring, B.K. A comprehensive model of anaerobic bioconversion of complex substrates to biogas. *Biotechnology and bioengineering* **1999**, *63*, 363-372.
3. Wernet, G.; Bauer, C.; Steubing, B.; Reinhard, J.; Moreno-Ruiz, E.; Weidema, B. The ecoinvent database version 3 (part I): overview and methodology. *The International Journal of Life Cycle Assessment* **2016**, *21*, 1218-1230.
